# Supplementary material for: Assessment of the immune landscapes of advanced ovarian cancer in an optimized in vivo model
Source: PubMed Central journal article supplement (PMC8506632; doi:10.1002/ctm2.551), 2021-10-12
Supplement: CTM2-11-e551-s001.pdf [file CTM2-11-e551-s001.pdf]

## Supplementary material

|                | Event Count | % of Total | % of Parent              |
|----------------|-------------|------------|--------------------------|
| Ungated        | 31271       |            |                          |
| Cell           | 31271       | 100%       | 100% of Ungated          |
| Singlet        | 31271       | 100%       | 100% of Cell             |
| live           | 31271       | 100%       | 100% of Singlet          |
| CD45+          | 31271       | 100%       | 100% of live             |
| CD4+           | 6191        | 19.8%      | 19.8% of CD45+           |
| IFNg+CD4       | 3468        | 11.09%     | 56.02% of CD4+           |
| PD1+CD4        | 128         | 0.41%      | 2.07% of CD4+            |
| Treg           | 73          | 0.23%      | 1.18% of CD4+            |
| CD8+           | 7634        | 24.41%     | 24.41% of CD45+          |
| IFNg+CD8       | 2639        | 8.44%      | 34.57% of CD8+           |
| Ly6C+CD44+CD8  | 2253        | 7.2%       | 29.51% of CD8+           |
| PD1+CD8        | 148         | 0.47%      | 1.94% of CD8+            |
| Non CD4/CD8    | 16735       | 53.52%     | 53.52% of CD45+          |
| B cell         | 13977       | 44.7%      | 83.52% of Non CD4/CD8    |
| CD11b-         | 1602        | 5.12%      | 9.57% of Non CD4/CD8     |
| NK             | 167         | 0.53%      | 10.42% of CD11b-         |
| CD11b+         | 619         | 1.98%      | 3.7% of Non CD4/CD8      |
| Eosinophil     | 18          | 0.06%      | 2.91% of CD11b+          |
| SiglecF-CD11b+ | 596         | 1.91%      | 96.28% of CD11b+         |
| DC             | 240         | 0.77%      | 40.27% of SiglecF-CD11b+ |
| gateout DC     | 345         | 1.1%       | 57.89% of SiglecF-CD11b+ |
| Neutrophil     | 124         | 0.4%       | 35.94% of gateout DC     |
| Other Myeloid  | 217         | 0.69%      | 62.9% of gateout DC      |
| Macrophage     | 28          | 0.09%      | 12.9% of Other Myeloid   |
| Monocyte       | 104         | 0.33%      | 47.93% of Other Myeloid  |

**Supplementary Figure 1. Gating strategy for Cytof analysis.** Cells identified during the Cytof analysis were gated to identify specific immune cell populations according to their most representative markers. Cells that were identified as singlets and that were alive were first gated, followed by their positiveness to the immune-cell-wide marker CD45. Positiveness to CD4, CD8 was then used to gate all the immune subpopulations.
